# Supplementary material for: Understanding the broadband near-infrared luminescence in a highly distorted garnet Ca4HfGe3O12:Cr3+ phosphor
Source: Royal Society of Chemistry journal article supplement (doi:10.1039/d3cp01547e), 2023-01-01
Supplement: d3cp01547e1.pdf [file d3cp01547e1.pdf]

## Supporting Information

### Understanding the broadband near-infrared luminescence in a highly distorted garnet $\text{Ca}_4\text{HfGe}_3\text{O}_{12}:\text{Cr}^{3+}$ phosphor

Zurong Liao<sup>a</sup>, Jiyou Zhong<sup>a,\*</sup>, Chaojie Li<sup>a</sup>, Huan Jiang<sup>a</sup>, and Weiren Zhao<sup>a,b,\*</sup>

<sup>a</sup>School of Physics and Optoelectronic Engineering, Guangdong University of Technology, Guangzhou 510006, China. E-mail: zhongjiyou@126.com; zwren123@126.com.

<sup>b</sup>Guangdong Provincial Key Laboratory of Information Photonics Technology, Guangdong University of Technology Guangzhou 510006, China.

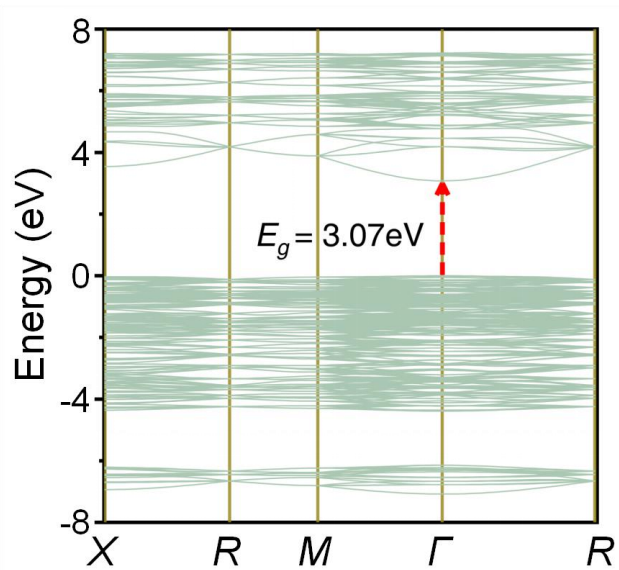

**Fig. S1.** Electronic band structure of  $\text{Ca}_4\text{HfGe}_3\text{O}_{12}$  calculated with DFT-PBE functional.

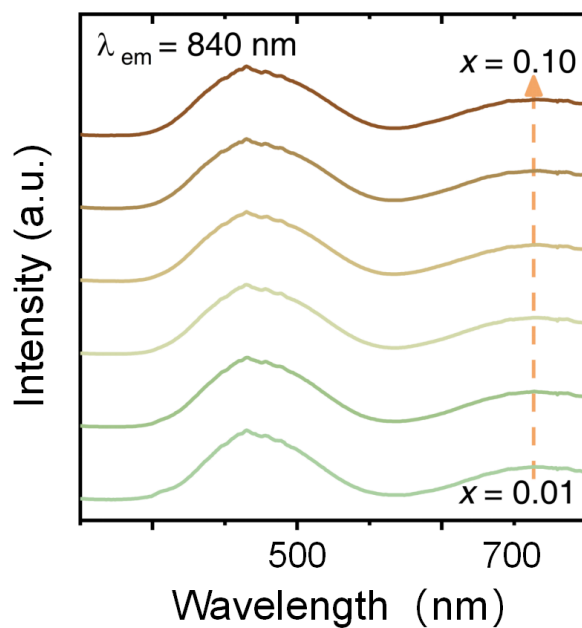

**Fig. S2.** PLE spectra of  $\text{Ca}_4\text{Hf}_{1-x}\text{Ge}_3\text{O}_{12}:x\text{Cr}^{3+}$  ( $x = 0.01, 0.02, 0.04, 0.06, 0.08,$  and  $0.10$ ) monitored at 840 nm.

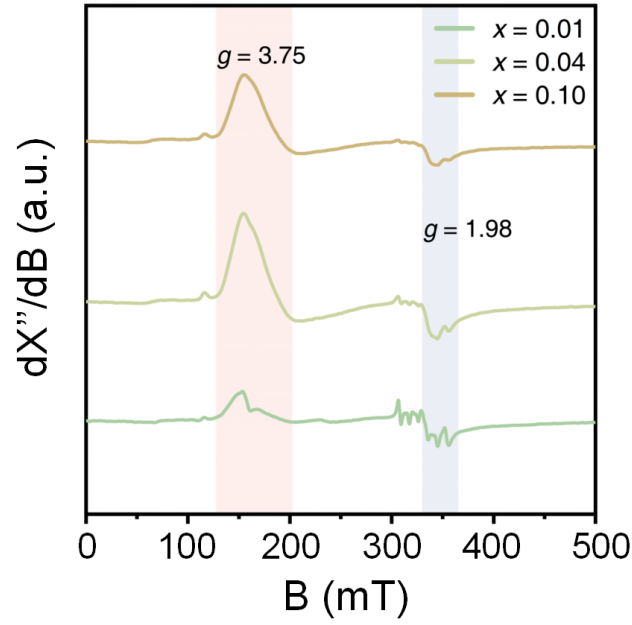

**Fig. S3.** EPR spectra of  $\text{Ca}_4\text{Hf}_{1-x}\text{Ge}_3\text{O}_{12}:x\text{Cr}^{3+}$  ( $x = 0.01, 0.04, \text{ and } 0.10$ ).

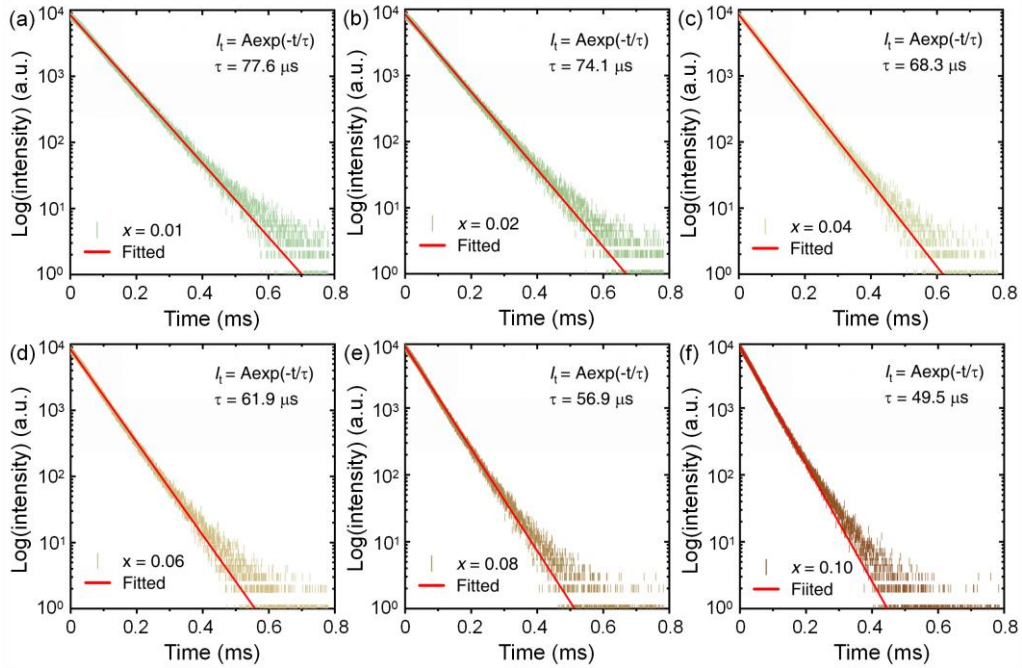

**Fig. S4.** Decay curves fitted by single-exponential function of  $\text{Ca}_4\text{Hf}_{1-x}\text{Ge}_3\text{O}_{12}:x\text{Cr}^{3+}$  ( $x=0.01, 0.02, 0.04, 0.06, 0.08, \text{ and } 0.10$ ).
